CORRECTION

# Correction: Characteristics of the memory sources of dreams: A new version of the content-matching paradigm to take mundane and remote memories into account

Raphael Vallat, Benoit Chatard, Mark Blagrove, Perrine Ruby

## Notice of republication

This article was republished on October 27, 2017 to replace incorrect versions of S1 Table and S3 Table. Please download this article again to view the corrected tables.

## Reference

1. Vallat R, Chatard B, Blagrove M, Ruby P (2017) Characteristics of the memory sources of dreams: A new version of the content-matching paradigm to take mundane and remote memories into account. PLoS ONE 12(10): e0185262. <https://doi.org/10.1371/journal.pone.0185262> PMID: 29020066

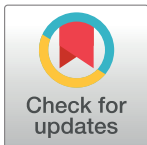

## OPEN ACCESS

**Citation:** Vallat R, Chatard B, Blagrove M, Ruby P (2018) Correction: Characteristics of the memory sources of dreams: A new version of the content-matching paradigm to take mundane and remote memories into account. PLoS ONE 13(2): e0193440. <https://doi.org/10.1371/journal.pone.0193440>

**Published:** February 21, 2018

**Copyright:** © 2018 Vallat et al. This is an open access article distributed under the terms of the [Creative Commons Attribution License](https://creativecommons.org/licenses/by/4.0/), which permits unrestricted use, distribution, and reproduction in any medium, provided the original author and source are credited.
